# Supplementary material
Source: PubMed Central journal article supplement (PMC6869800)
Supplement: HBM-36-4592-s002.pdf [file HBM-36-4592-s002.pdf]

## Figure legend

Figure 1 (supplementary): Two spatial clusters on source level showed higher evoked power during the CS+ projection as compared to CS- at 30 Hz when only the 15 subjects with individual MRs were used for the analysis. The first cluster (size = 21 voxels), lateralized contralateral to the US delivery, has its maximum in the thalamus. The second cluster (size = 15 voxels) comprises cerebellum, has its maximum also at the right, however it does not result significant with 15 participants.
